# Supplementary material for: Amalgamating at the molecular level. A study of the strong closed-shell Au(i)⋯Hg(ii) interaction
Source: Royal Society of Chemistry journal article supplement (doi:10.1039/c1cc11036e), 2011-01-01
Supplement: c1cc11036e.pdf [file c1cc11036e.pdf]

## **Amalgamating at the Molecular Level. Study of the Strong Closed-Shell Au(I)···Hg(II) interaction.**

**José M. López-de-Luzuriaga,<sup>\*a</sup> Miguel Monge,<sup>a</sup> M. Elena Olmos,<sup>a</sup> David Pascual<sup>a</sup> and Tania Lasanta<sup>a</sup>**

<sup>a</sup> *Departamento de Química, Universidad de La Rioja, Grupo de Síntesis Química de La Rioja, UA-CSIC. Complejo Científico-Tecnológico, 26004-Logroño, SPAIN.*

**ELECTRONIC SUPPLEMENTARY INFORMATION**

## Experimental Section.

**General.** All reactions were carried out under dry and deoxygenated argon atmosphere using Schlenk techniques. All solvents were distilled.  $[\text{Hg}(\text{C}_6\text{F}_5)_2]$  was prepared according to literature methods.<sup>1</sup>

**Instrumentation.** Infrared spectra were recorded in the 4000-200  $\text{cm}^{-1}$  range on a Perkin-Elmer FT-IR Spectrum 1000 spectrophotometer, using Nujol mulls between polyethylene sheets.  $^1\text{H}$ , and  $^{19}\text{F}$  and  $^{31}\text{P}\{^1\text{H}\}$  NMR spectra were recorded on a Bruker Avance 400 in chloroform solutions. Chemical shifts are quoted relative to  $\text{SiMe}_4$  ( $^1\text{H}$  external),  $\text{CFCl}_3$  ( $^{19}\text{F}$  external) and  $\text{H}_3\text{PO}_4$  85% ( $^{31}\text{P}$  external).

**Synthesis of  $[\text{Au}(\text{C}_6\text{F}_5)\text{PMe}_3]$  1:** To a dichloromethane solution (30 mL) of the  $[\text{Au}(\text{C}_6\text{F}_5)(\text{tht})]$  (0.4 g, 0.88 mmol) was added 1M THF solution of  $\text{PMe}_3$  (0.88ml, 0.88 mmol). The reaction mixture was stirred for 30 min at room temperature. Evaporation of the solvent under vacuum and addition of *n*-hexane gave rise to complex **1** as a white solid in 54% yield.  $^{19}\text{F}$  NMR (282 MHz,  $\text{CDCl}_3$ ),  $\delta$  -116.5 (m, 2F,  $F_o$ ), -158.6 (t,  $^3J_{\text{F-F}}=20$  Hz, 1F,  $F_p$ ), -162.5 (m, 2F,  $F_m$ ).  $^1\text{H}$  NMR (300 MHz,  $\text{CDCl}_3$ ),  $\delta$  1.61 ppm (d).  $^{31}\text{P}$  NMR (121.5 MHz,  $\text{CDCl}_3$ ),  $\delta$  3.28 ppm (s). FT-IR (Nujol mulls):  $\nu = 1502, 954.5, 786 \text{ cm}^{-1}$  (Au-C $_6\text{F}_5$ ). Anal. Calcd for ( $\text{C}_9\text{H}_9\text{AuF}_5\text{P}$ ): C, 24.56; H, 2.06%. Found: C, 24.16; H, 2.05%.

**Synthesis of  $[\text{Au}(\text{C}_6\text{F}_5)\text{PMe}_3]_2[\text{Hg}(\text{C}_6\text{F}_5)_2]$  2:** To a dichloromethane solution (30 mL) of  $[\text{Hg}(\text{C}_6\text{F}_5)_2]$  (0.122 g, 0.227 mmol) was added  $[\text{Au}(\text{C}_6\text{F}_5)_2\text{PMe}_3]$  (0.200 g, 0.454 mmol). The reaction mixture was stirred for 30 min at room temperature. Evaporation of the solvent under vacuum and addition of *n*-hexane gave rise to complex **2** as a white solid in 87% yield.  $^{19}\text{F}$  NMR (282 MHz,  $\text{CDCl}_3$ ),  $\delta$  -119.7(m,  $^3J_{\text{F-Hg}} = 414$  Hz, 4F,  $F_o$ , Hg-C $_6\text{F}_5$ ), -150.6(m, 2F,  $F_p$ , Hg-C $_6\text{F}_5$ ), -159.0 (m, 4F,  $F_m$ , Hg-C $_6\text{F}_5$ ), -116.6 (m, 4F,  $F_o$ , Au-

C<sub>6</sub>F<sub>5</sub>), -158.6(t, <sup>3</sup>J<sub>F-F</sub>=20 Hz, 2F, F<sub>p</sub>, Au-C<sub>6</sub>F<sub>5</sub>), -162.5 ppm (m, 4F, F<sub>m</sub>, Au-C<sub>6</sub>F<sub>5</sub>). <sup>1</sup>H NMR (300 MHz, CDCl<sub>3</sub>), δ 1.6 ppm (d). <sup>31</sup>P NMR (121.5 MHz, CDCl<sub>3</sub>), δ 3.3 ppm (s). FT-IR (Nujol mulls): ν = 1500, 960, 787 cm<sup>-1</sup> (Au-C<sub>6</sub>F<sub>5</sub>), ν = 1637, 1371 and 805 cm<sup>-1</sup> (Hg-C<sub>6</sub>F<sub>5</sub>). Anal. Calcd for (C<sub>30</sub>H<sub>18</sub>Au<sub>2</sub>F<sub>20</sub>HgP<sub>2</sub>): C, 25.47; H, 1.28%. Found: C, 25.42; H, 1.28%.

### Computational details.

All calculations were performed using the Gaussian 09 suite of programs<sup>2</sup> using DFT/B3LYP,<sup>3</sup> Hartree-Fock and MP2<sup>4</sup> levels of theory

The interaction energy between ionic counterparts at Hartree-Fock (HF) and MP2 levels of theory was obtained according to equation:

$$\Delta E = E_{AB}^{(AB)} - E_A^{(AB)} - E_B^{(AB)} = V(R)$$

a counterpoise correction for the basis-set superposition error (BSSE)<sup>5</sup> on ΔE was thereby performed. We fitted the calculated points using a four-parameter equation, which had been previously used<sup>6</sup> to derive the Herschbach-Laurie relation:<sup>7</sup>

$$\Delta E = V(R) = Ae^{-BR} - CR^{-n}$$

**Basis Sets.** The 19-valence electron (VE) quasirelativistic (QR) pseudopotential (PP) of Andrae<sup>8</sup> was employed for gold together with two f-type polarization functions (exponents: 0.2, 1.19).<sup>9</sup> Similarly, the 20-valence valence electron (VE) quasirelativistic (QR) pseudopotential (PP) of Andrae<sup>8</sup> was employed for mercury together with two f-type polarization functions (exponents: 0.545, 1.58).<sup>10</sup>

The atoms F, P, and C were treated by Stuttgart pseudopotentials,<sup>11</sup> including only the valence electrons for each atom. For these atoms double-zeta basis sets of ref 10 were

used, augmented by d-type polarization functions.<sup>12</sup> For the H atom, a double-zeta, plus a p-type polarization function was used.<sup>13</sup>

**Table S1.** Main structural parameters for complex **1** and DFT optimized distances (Å) and angles (°) for model systems **A**, **B** and **C** at the MP2 equilibrium distances.

|                  | M-M   | Hg-C <sub>ipso</sub> | Au-C  | Au-P  | Hg-C  | C-Au-P | C-Hg-C |
|------------------|-------|----------------------|-------|-------|-------|--------|--------|
| Complex <b>2</b> | 3.186 | 3.288                | 2.085 | 2.288 | 2.091 | 176.81 | 179.96 |
| Model <b>A</b>   | 3.098 | 3.176                | 2.063 | 2.356 | 2.119 | 177.39 | 177.85 |
| Model <b>B</b>   | 3.011 | 3.469                | 2.058 | 2.346 | 2.112 | 180.0  | 180.0  |
| Model <b>C</b>   | 3.009 | -                    | 2.058 | 2.346 | -     | 180.0  | -      |

## References.

[1] Deacon, G. B.; Cosgriff, J. E.; Lawrenz, E. T.; Forsyth, C. M.; Wilkinson, D. L. in *Synthetic Methods of Organometallic and Inorganic Chemistry (Herrmann/Brauer)*. Ed. Herrmann, W. A. Thieme, New York, 1997, vol 6 (vol. Ed. Edelmann), p. 48-51.

[2] Gaussian 09, Revision A.1, Frisch, M. J.; Trucks, G. W.; Schlegel, H. B.; Scuseria, G. E.; Robb, M. A.; Cheeseman, J. R.; Scalmani, G.; Barone, V.; Mennucci, B.; Petersson, G. A.; Nakatsuji, H.; Caricato, M.; Li, X.; Hratchian, H. P.; Izmaylov, A. F.; Bloino, J.; Zheng, G.; Sonnenberg, J. L.; Hada, M.; Ehara, M.; Toyota, K.; Fukuda, R.; Hasegawa, J.; Ishida, M.; Nakajima, T.; Honda, Y.; Kitao, O.; Nakai, H.; Vreven, T.; Montgomery, Jr., J. A.; Peralta, J. E.; Ogliaro, F.; Bearpark, M.; Heyd, J. J.; Brothers, E.; Kudin, K. N.; Staroverov, V. N.; Kobayashi, R.; Normand, J.; Raghavachari, K.; Rendell, A.; Burant, J. C.; Iyengar, S. S.; Tomasi, J.; Cossi, M.; Rega, N.; Millam, N. J.; Klene, M.; Knox, J. E.; Cross, J. B.; Bakken, V.; Adamo, C.; Jaramillo, J.; Gomperts, R.; Stratmann, R. E.; Yazyev, O.; Austin, A. J.; Cammi, R.; Pomelli, C.; Ochterski, J. W.; Martin, R. L.; Morokuma, K.; Zakrzewski, V. G.; Voth, G. A.; Salvador, P.; Dannenberg, J. J.; Dapprich, S.; Daniels, A. D.; Farkas, Ö;

Foresman, J. B.; Ortiz, J. V.; Cioslowski, J.; Fox, D. J. Gaussian, Inc., Wallingford CT, **2009**.

[3] a) Parr, R. G.; Yang, W. *Density-functional theory of atoms and molecules*; Oxford University Press: New York, 1989. b) Lee, C.; Yang, W.; Parr, R. G. *Phys. Rev. B* **1988**, *37*, 785.

[4] a) Møller, C.; Plesset, M.S. *Phys.Rev.* **1934**, *46*, 618. b) Hehre, W.J.; Radom, L.; Schleyer, P.v.R.; Pople, J.A. *Ab Initio Molecular Orbital Theory*; John Wiley: New York, 1986.

[5] Boys, S. F.; Bernardi, F. *Mol. Phys.* **1970**, *19*, 553.

[6] Pyykkö, P. *Chem. Rev.* **1997**, *97*, 597.

[7] Herschbach, D. R.; Laurie, V. W. *J. Chem. Phys.* **1961**, *35*, 458.

[8] Andrae, D.; Häusserman, U.; Dolg, M.; Stoll, H.; Preuss, H. *Theor. Chim. Acta* **1990**, *77*, 123.

[9] Pyykkö, P.; Runeberg, N.; Mendizabal, F. *Chem. Eur. J.* **1997**, *3*, 1451.

[10] Martin, J. M. L.; Sundermann, A. *J. Chem. Phys.* **2001**, *114*, 3408.

[11] Bergner, A.; Dolg, M.; Küchle, W.; Stoll, H.; Preuss, H. *Mol. Phys.* **1993**, *80*, 1431.

[12] Huzinaga, S. *Gaussian Basis Sets for Molecular Calculations*; Elsevier: Amsterdam, 1984; p16.

[13] Huzinaga S. *J. Chem. Phys.* **1965**, *42*, 1293.

## GEOMETRIES IN XYZ FORMAT FOR THE MODEL SYSTEMS AT THE MP2

### EQUILIBRIUM DISTANCES

#### MODEL A

|    |             |             |             |
|----|-------------|-------------|-------------|
| Hg | 0.00000000  | 0.00000000  | 0.00000000  |
| C  | 2.11886200  | 0.00000000  | 0.00000000  |
| C  | 2.85041100  | 1.18003900  | 0.00000000  |
| C  | 2.84797000  | -1.17729400 | -0.07983400 |
| C  | 4.23966700  | 1.20647600  | -0.06902200 |
| C  | 4.23569500  | -1.20475600 | -0.15309100 |
| C  | 4.93398200  | 0.00086400  | -0.14489900 |
| C  | -2.11733400 | -0.02496800 | 0.07525100  |
| C  | -2.83457500 | -1.21125200 | 0.02711200  |
| C  | -2.86255400 | 1.14630500  | 0.09575000  |
| C  | -4.22361500 | -1.25551500 | 0.00362200  |
| C  | -4.25359600 | 1.15592600  | 0.07623500  |
| C  | -4.93560501 | -0.05822000 | 0.03097600  |
| F  | 2.19724100  | -2.36345300 | -0.11203400 |
| F  | 4.90020201  | -2.35891701 | -0.23677900 |
| F  | 6.26139300  | -0.00032900 | -0.21438800 |
| F  | 4.90840000  | 2.35700300  | -0.07285900 |
| F  | 2.20293600  | 2.35852400  | 0.03926000  |
| F  | -2.22829700 | 2.33258100  | 0.10629800  |
| F  | -4.93582300 | 2.29841500  | 0.09074600  |
| F  | -6.26454100 | -0.07551200 | 0.00895400  |
| F  | -4.87679401 | -2.41785100 | -0.05065300 |
| F  | -2.17112400 | -2.38965300 | -0.02264100 |
| H  | 1.09655390  | -3.94938158 | -2.06171432 |
| P  | -0.02148910 | -3.37203957 | -2.72752631 |
| Au | -0.04321410 | -1.02434657 | -2.92343131 |
| H  | -0.05167610 | -4.16495557 | -3.91101931 |
| H  | -1.09006809 | -3.96396456 | -1.99642131 |
| C  | -0.05999110 | 1.03709043  | -3.00136731 |
| C  | -1.24539610 | 1.76997743  | -2.99093531 |
| C  | 1.11410790  | 1.78751343  | -3.03064831 |
| C  | -1.28029810 | 3.16088743  | -3.00118231 |
| F  | -2.42971510 | 1.12991843  | -2.94237331 |
| C  | 1.12796590  | 3.17878843  | -3.04179431 |
| F  | 2.30874091  | 1.16507443  | -3.02227431 |
| C  | -0.08147110 | 3.86922943  | -3.02703631 |
| F  | -2.43936510 | 3.81892643  | -2.97490031 |
| F  | 2.27735090  | 3.85402843  | -3.05471431 |
| F  | -0.09147810 | 5.19905443  | -3.03357831 |

#### MODEL B

|    |             |             |             |
|----|-------------|-------------|-------------|
| Hg | 0.00000000  | 0.00000000  | 0.00000000  |
| C  | 2.11186100  | 0.00000000  | 0.00000000  |
| C  | 2.84219400  | 1.18278500  | 0.00000000  |
| C  | 2.84219400  | -1.18278500 | 0.00000000  |
| C  | 4.23311799  | 1.20711900  | 0.00000000  |
| C  | 4.23311799  | -1.20711900 | 0.00000000  |
| C  | 4.92933200  | -0.00000000 | 0.00000000  |
| C  | -2.11186100 | 0.00000000  | -0.00000000 |

Supplementary Material (ESI) for Chemical Communications  
This journal is (c) The Royal Society of Chemistry 2011

|    |             |             |             |
|----|-------------|-------------|-------------|
| C  | -2.84219400 | -1.18278499 | -0.00000000 |
| C  | -2.84219400 | 1.18278500  | -0.00000000 |
| C  | -4.23311800 | -1.20711899 | 0.00000000  |
| C  | -4.23311800 | 1.20711900  | -0.00000000 |
| C  | -4.92933200 | -0.00000000 | -0.00000000 |
| F  | 2.19530800  | -2.36169100 | 0.00000000  |
| F  | 4.90276699  | -2.35835999 | 0.00000000  |
| F  | 6.25759400  | -0.00000000 | 0.00000000  |
| F  | 4.90276699  | 2.35835999  | -0.00000000 |
| F  | 2.19530800  | 2.36169100  | 0.00000000  |
| F  | -2.19530800 | 2.36169100  | -0.00000000 |
| F  | -4.90276700 | 2.35836000  | -0.00000000 |
| F  | -6.25759400 | -0.00000000 | -0.00000000 |
| F  | -4.90276700 | -2.35835999 | -0.00000000 |
| F  | -2.19530800 | -2.36169100 | 0.00000000  |
| H  | 1.09220600  | -3.34269084 | -2.36485772 |
| P  | 0.00000000  | -2.66658884 | -2.98413872 |
| Au | -0.00000000 | -0.32028685 | -2.99391672 |
| H  | -0.01471200 | -3.34830185 | -4.23632572 |
| H  | -1.08228000 | -3.33536384 | -2.34063772 |
| C  | 0.00000000  | 1.73753716  | -3.00249272 |
| C  | -1.17863700 | 2.47787116  | -2.99456872 |
| C  | 1.17905200  | 2.47714716  | -3.01707772 |
| C  | -1.21431900 | 3.88779315  | -2.99839472 |
| F  | -2.37057400 | 1.84906316  | -2.98009072 |
| C  | 1.20351500  | 3.86869116  | -3.02397672 |
| F  | 2.37068000  | 1.84759616  | -3.02537272 |
| C  | 0.00000000  | 4.56880215  | -3.01429172 |
| F  | -2.35867000 | 4.57905415  | -2.98798372 |
| F  | 2.35992300  | 4.53951916  | -3.03824572 |
| F  | 0.00002700  | 5.90239716  | -3.01997672 |

**MODEL C**

|    |             |             |             |
|----|-------------|-------------|-------------|
| Au | 0.00000000  | 0.00000000  | 0.00000000  |
| C  | 2.05784100  | 0.00000000  | 0.00000000  |
| C  | 2.84072600  | 1.15084100  | 0.00000000  |
| C  | 2.75379400  | -1.20527700 | 0.01892100  |
| C  | 4.23215100  | 1.12375200  | 0.01721300  |
| C  | 4.14342300  | -1.28052600 | 0.03650100  |
| C  | 4.88699300  | -0.10411300 | 0.03557300  |
| P  | -2.34632200 | -0.00000000 | 0.00000000  |
| F  | 2.25596100  | 2.36495500  | -0.01734000 |
| F  | 4.94545700  | 2.25454100  | 0.01635300  |
| F  | 6.21959400  | -0.15317800 | 0.05220000  |
| F  | 4.77147501  | -2.46066700 | 0.05415100  |
| F  | 2.08113000  | -2.37313900 | 0.02069200  |
| H  | -3.02281199 | 0.55890400  | 1.12379400  |
| H  | -3.02500000 | 0.69120700  | -1.04650200 |
| H  | -3.01777400 | -1.25535000 | -0.07702300 |
| P  | -0.38307727 | -2.69392098 | 2.74910113  |
| Au | -0.36605127 | -0.35528998 | 2.95631113  |
| H  | 0.73144173  | -3.23453798 | 2.09673613  |
| H  | -0.42841027 | -3.38799998 | 3.96409013  |
| H  | -1.47183427 | -3.20465298 | 2.03232913  |
| C  | -0.35837727 | 1.70382202  | 3.14089613  |
| C  | 0.81881173  | 2.44584302  | 3.14988513  |
| C  | -1.53150627 | 2.44191502  | 3.26577513  |

Supplementary Material (ESI) for Chemical Communications  
This journal is (c) The Royal Society of Chemistry 2011

|   |             |            |            |
|---|-------------|------------|------------|
| C | 0.84827373  | 3.83189202 | 3.27389413 |
| F | 2.01072274  | 1.82293802 | 3.03459913 |
| C | -1.55341427 | 3.82780902 | 3.39244013 |
| F | -2.72690928 | 1.81489602 | 3.26840713 |
| C | -0.35064026 | 4.52747802 | 3.39628213 |
| F | 2.00620771  | 4.50335306 | 3.27744766 |
| F | -2.70766227 | 4.49528402 | 3.51022913 |
| F | -0.34702326 | 5.85716702 | 3.51662713 |
